# Supplementary material for: LC-ESI-QTOF-MS/MS Identification and Characterization of Phenolic Compounds from Leaves of Australian Myrtles and Their Antioxidant Activities
Source: MDPI journal article supplement (doi:10.3390/molecules29102259), 2024-05-11
Supplement: s1 [file s1]

## Supplementary Material

### LC-ESI-QTOF-MS/MS identification and characterization of phenolic compounds from leaves of Australian myrtles and their antioxidant activities

#### Gallic acid

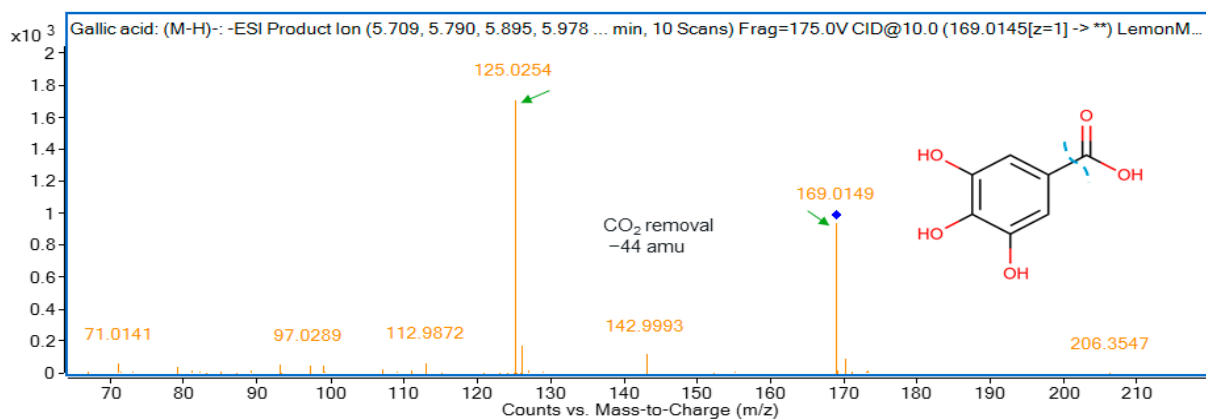

#### *p*-Hydroxybenzoic acid

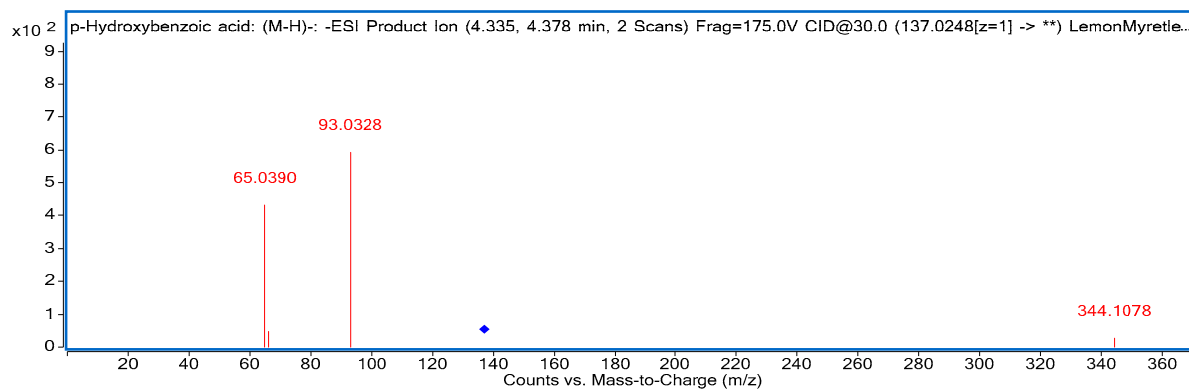

#### *p*-Coumaric acid

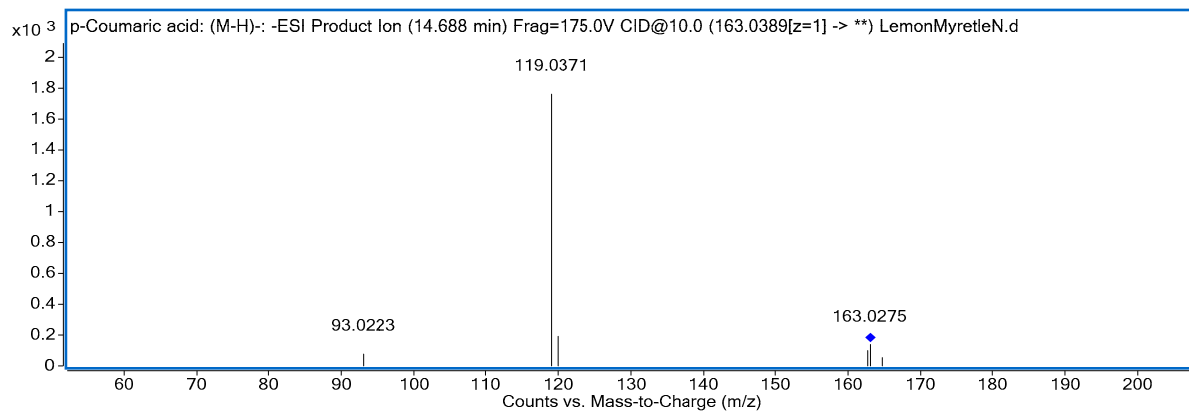

## Scopoletin

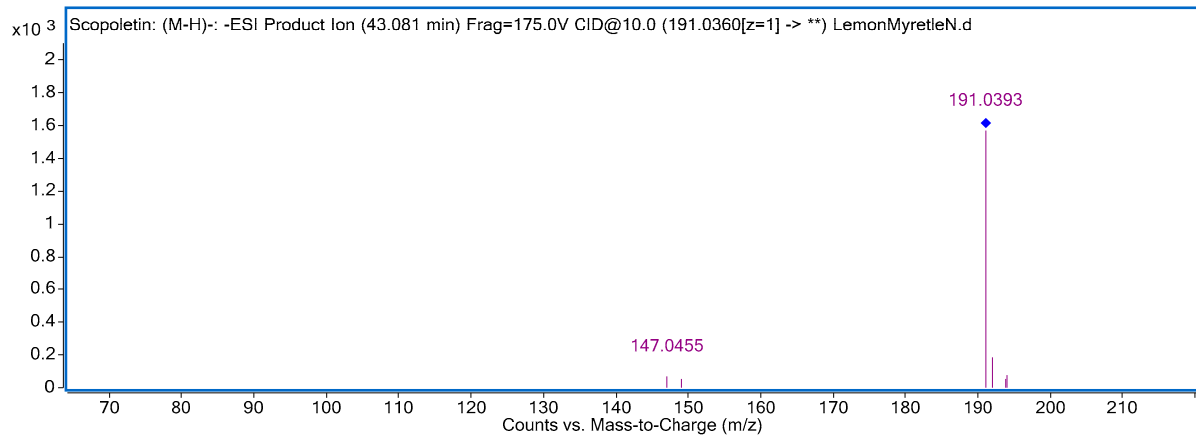

## Eriodictyol

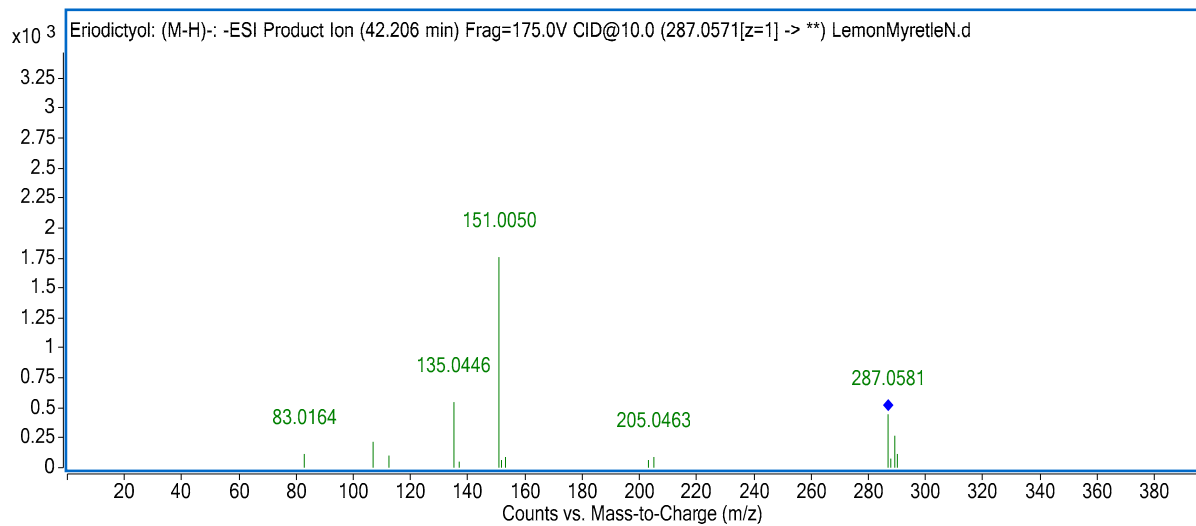

## Ellagic acid

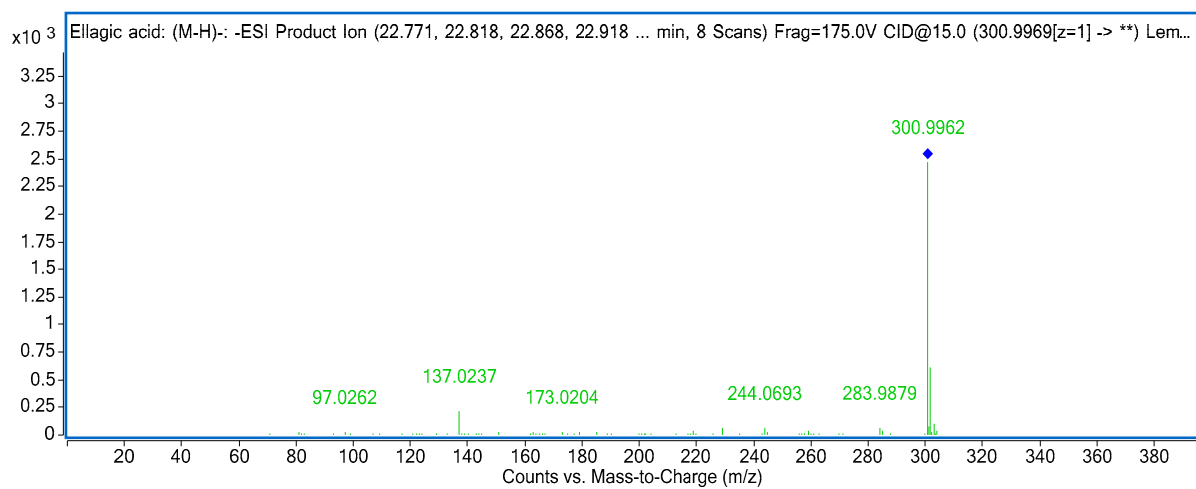

## Quercetin

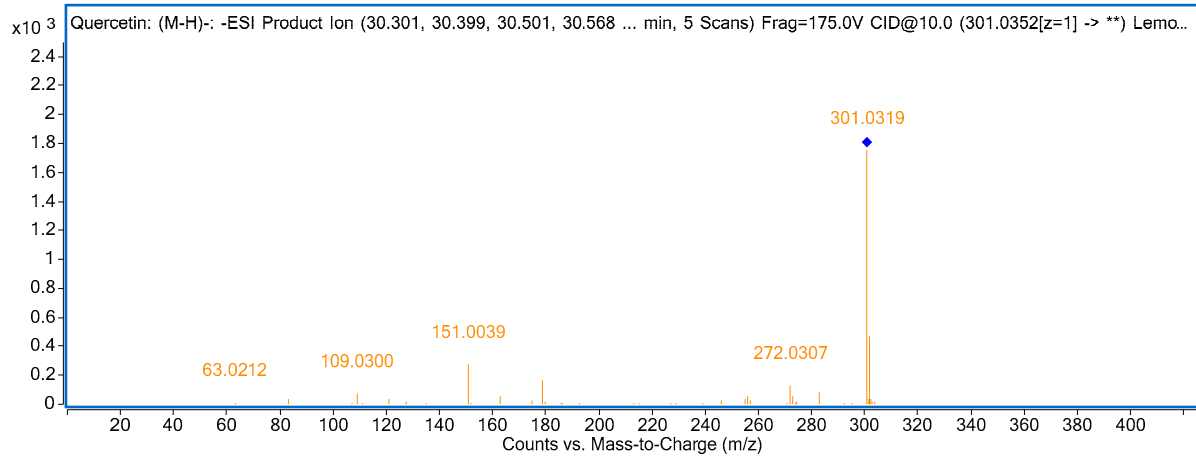

## Procatechuic acid 4-O-glucoside

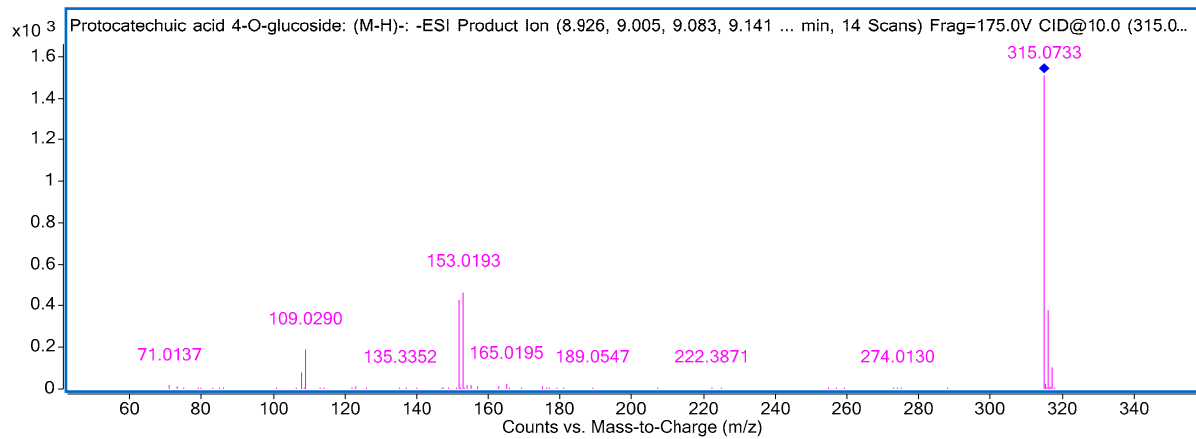

## *p*-coumaric acid 4-O-glucoside

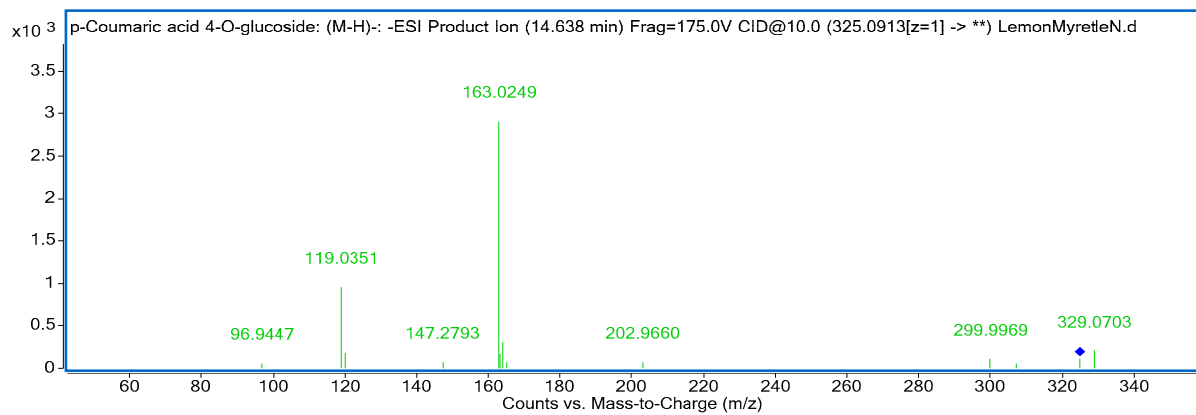

## Corilagin

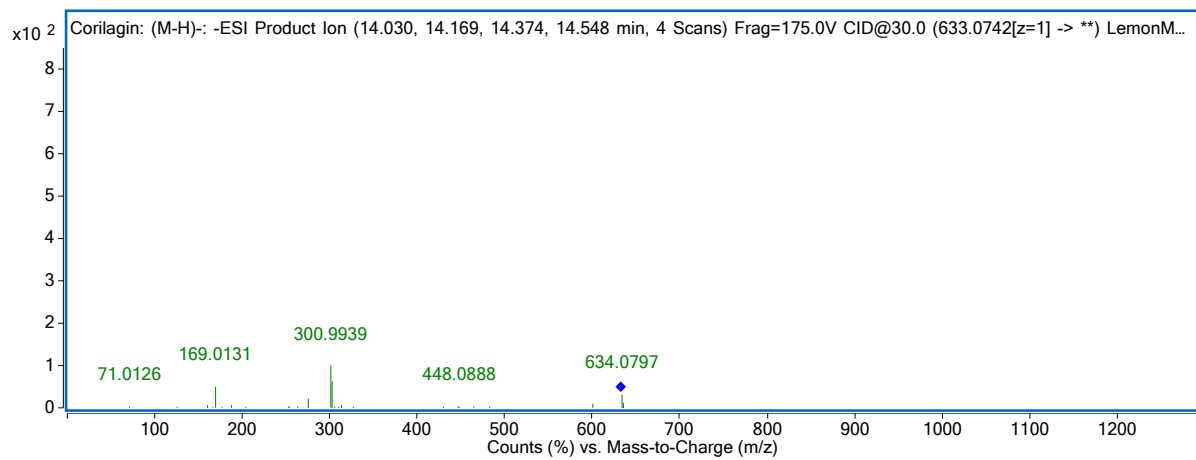

## Potentillin

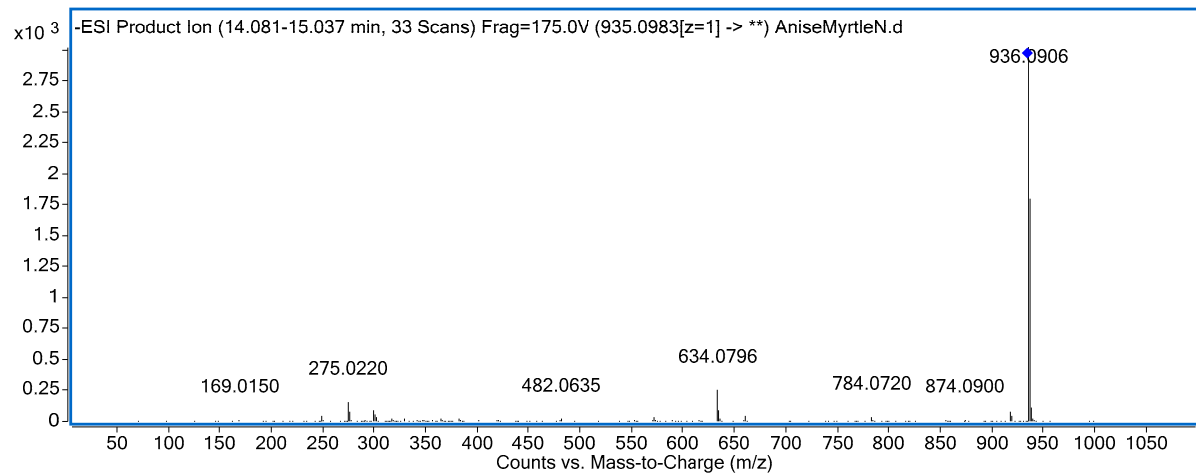

## Catechin

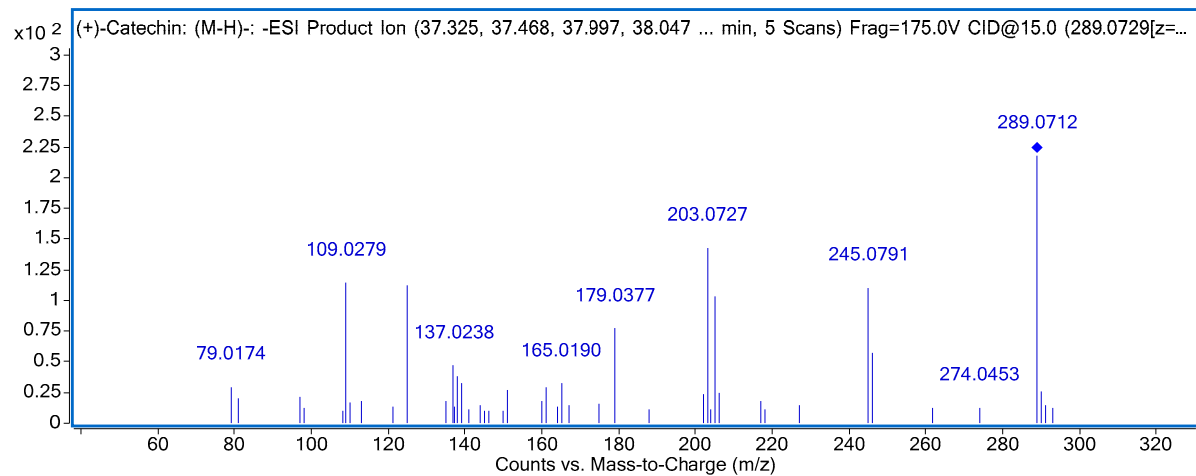

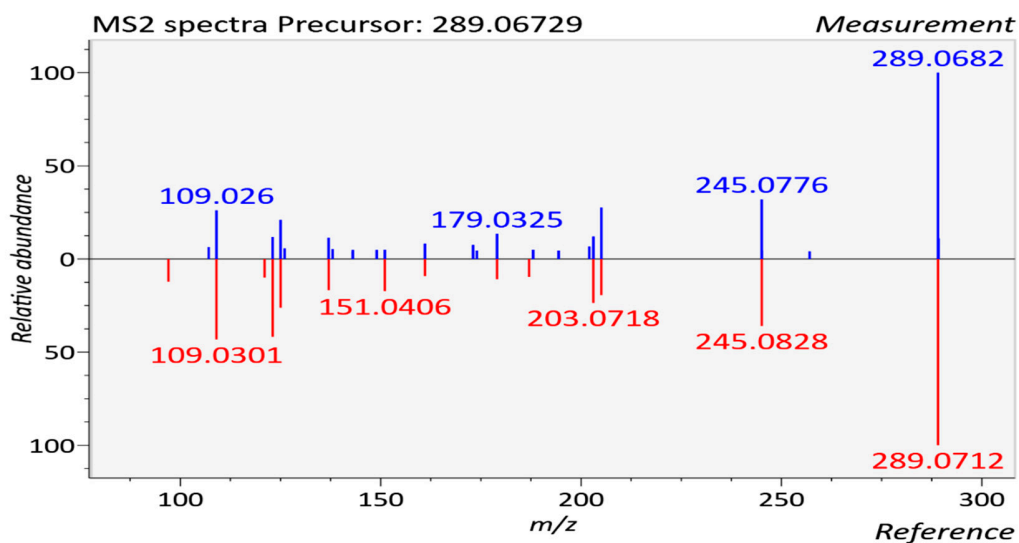

Quercetin 3-O-rhamnoside

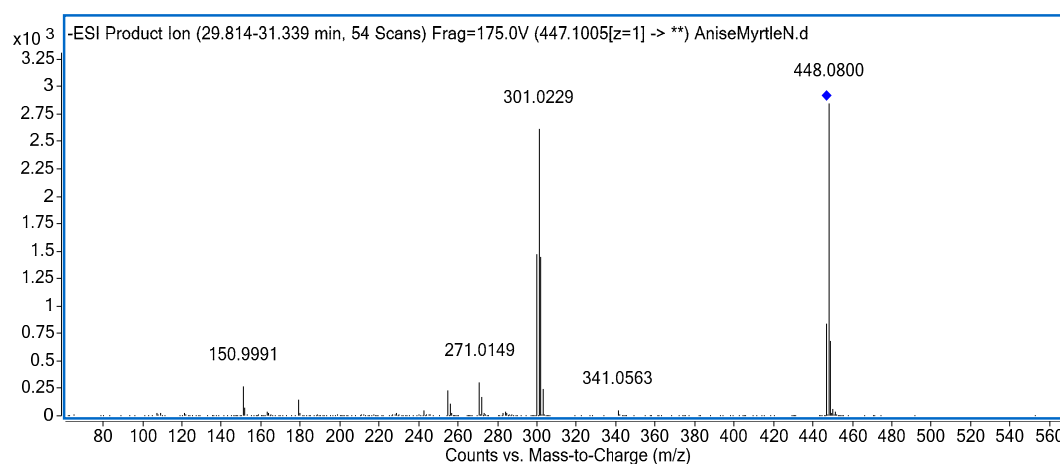

Orientin

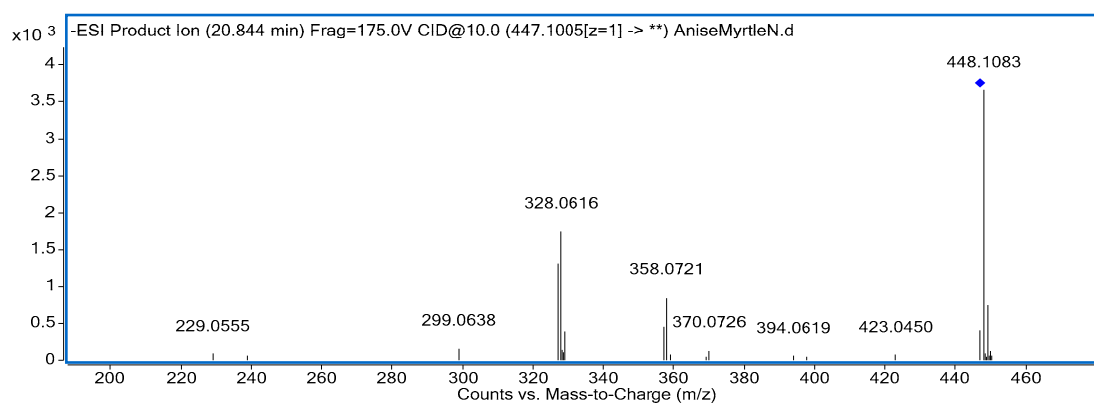

Myricetin 3-arabinoside

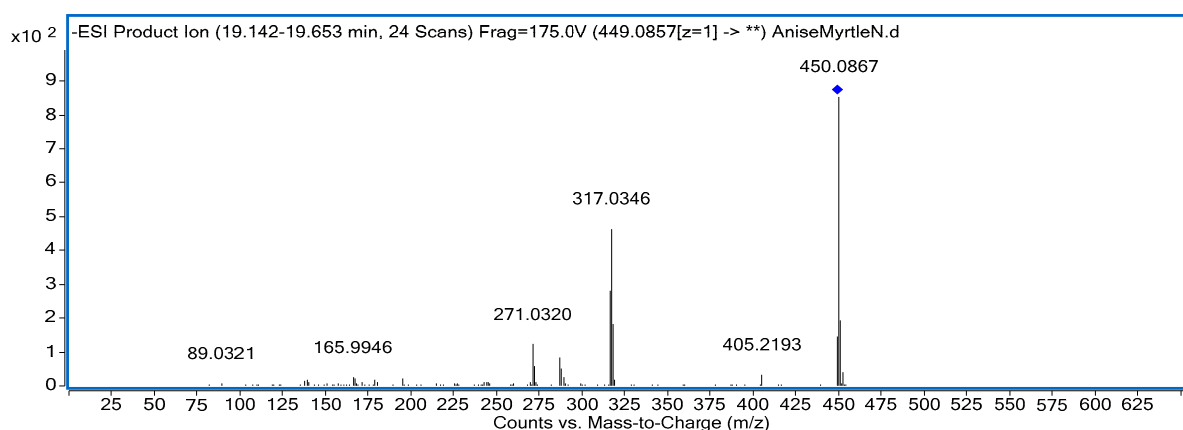

**Figure S1.** MS/MS spectra of some selected compounds identified in leaves of Australian myrtles.

**Table S1.** LC-MS/MS Quantification of phenolic compounds from Australian myrtles

| No.                              | Compounds                                      | Formula                                         | AM (µg/g)        | LM (µg/g)        | CM (µg/g)       |
|----------------------------------|------------------------------------------------|-------------------------------------------------|------------------|------------------|-----------------|
| <b>Phenolic acids</b>            |                                                |                                                 |                  |                  |                 |
| 1                                | Gallic Acid                                    | C <sub>7</sub> H <sub>6</sub> O <sub>5</sub>    | 139.19 ± 8.32    | 202.21 ± 9.87    | 37.11 ± 6.19    |
| 2                                | <i>p</i> -Hydroxybenzoic acid ( <i>p</i> -HBA) | C <sub>7</sub> H <sub>6</sub> O <sub>3</sub>    | 15.11 ± 1.15     | 79.13 ± 6.32     | 21.52 ± 3.52    |
| 3                                | <i>p</i> -Coumaric acid                        | C <sub>9</sub> H <sub>8</sub> O <sub>3</sub>    | NQ               | NQ               | 62.08 ± 7.49    |
| 4                                | Protocatechuic acid                            | C <sub>7</sub> H <sub>6</sub> O <sub>4</sub>    | 11.22 ± 2.65     | 24.02 ± 3.39     | 20.51 ± 4.03    |
| 5                                | Cinnamic acid                                  | C <sub>9</sub> H <sub>8</sub> O <sub>2</sub>    | 609.08 ± 23.32   | 312.03 ± 21.06   | NQ              |
| 6                                | Ferulic acid                                   | C <sub>10</sub> H <sub>10</sub> O <sub>4</sub>  | 21.05 ± 1.32     | 87.13 ± 5.14     | NQ              |
| 7                                | Chlorogenic acid                               | C <sub>16</sub> H <sub>18</sub> O <sub>9</sub>  | 52.14 ± 3.97     | 66.13 ± 4.06     | 67.92 ± 7.28    |
| 8                                | Syringic acid                                  | C <sub>9</sub> H <sub>10</sub> O <sub>5</sub>   | 1135.18 ± 44.56  | 231.01 ± 26.06   | 39.06 ± 6.05    |
| 9                                | Caffeic acid                                   | C <sub>9</sub> H <sub>8</sub> O <sub>4</sub>    | 161.12 ± 11.56   | NQ               | 13.46 ± 2.81    |
| 10                               | Coumaric acid 4- <i>O</i> -glucoside           | C <sub>15</sub> H <sub>18</sub> O <sub>8</sub>  | 123.17 ± 7.03    | 115.57 ± 9.85    | 84.42 ± 6.03    |
| 11                               | Sinapic acid                                   | C <sub>11</sub> H <sub>12</sub> O <sub>5</sub>  | NQ               | 199.32 ± 11.84   | NQ              |
| <b>Flavonoids</b>                |                                                |                                                 |                  |                  |                 |
| <b>Catechins and derivatives</b> |                                                |                                                 |                  |                  |                 |
| 12                               | Epicatechin                                    | C <sub>15</sub> H <sub>14</sub> O <sub>6</sub>  | 4149.81 ± 115.62 | 3437.16 ± 99.03  | 1244.82 ± 37.32 |
| 13                               | (-)-Epicatechin 3- <i>O</i> -gallate           | C <sub>22</sub> H <sub>18</sub> O <sub>10</sub> | 131.17 ± 9.73    | 1254.63 ± 76.14  | 322.61 ± 19.24  |
| 14                               | Catechin                                       | C <sub>15</sub> H <sub>14</sub> O <sub>6</sub>  | NQ               | 4867.14 ± 319.52 | NQ              |
| 15                               | Epigallocatechin                               | C <sub>15</sub> H <sub>14</sub> O <sub>7</sub>  | NQ               | 235.39 ± 22.93   | 171.46 ± 13.42  |
| 16                               | Procyanidin B2                                 | C <sub>30</sub> H <sub>26</sub> O <sub>12</sub> | 384.32 ± 17.04   | 1174.14 ± 54.43  | 110.32 ± 8.65   |
| <b>Flavonols</b>                 |                                                |                                                 |                  |                  |                 |
| 17                               | Isorhamnetin                                   | C <sub>16</sub> H <sub>12</sub> O <sub>7</sub>  | 145.32 ± 9.01    | 223.05 ± 11.19   | NQ              |
| 18                               | Quercetin                                      | C <sub>15</sub> H <sub>10</sub> O <sub>7</sub>  | 532.21 ± 19.37   | 301.92 ± 16.22   | NQ              |
| 19                               | Kaempferol                                     | C <sub>15</sub> H <sub>10</sub> O <sub>6</sub>  | 41.03 ± 6.13     | 25.43 ± 2.42     | 24.51 ± 2.09    |
| 20                               | Quercetin 3- <i>O</i> -rhamnoside              | C <sub>21</sub> H <sub>20</sub> O <sub>11</sub> | NQ               | NQ               | 101.87 ± 8.84   |
| 21                               | Myricetin 3- <i>O</i> -arabinoside             | C <sub>20</sub> H <sub>18</sub> O <sub>12</sub> | 943.98 ± 35.19   | NQ               | NQ              |
| <b>Flavones</b>                  |                                                |                                                 |                  |                  |                 |
| 22                               | Isovitexin                                     | C <sub>21</sub> H <sub>20</sub> O <sub>10</sub> | 3206.13 ± 132.07 | 303.87 ± 9.93    | 56.71 ± 7.18    |
| <b>Tannins</b>                   |                                                |                                                 |                  |                  |                 |
| 23                               | Grandinin                                      | C <sub>46</sub> H <sub>34</sub> O <sub>30</sub> | 65.16 ± 6.19     | NQ               | 154.12 ± 9.37   |
| 24                               | 2- <i>O</i> -Galloylpunicalin                  | C <sub>41</sub> H <sub>26</sub> O <sub>26</sub> | NQ               | NQ               | 110.21 ± 11.54  |
| 25                               | Ellagic acid glucoside                         | C <sub>10</sub> H <sub>16</sub> O <sub>13</sub> | 742.02 ± 22.43   | NQ               | NQ              |

|                        |             |                      |                   |                    |                  |
|------------------------|-------------|----------------------|-------------------|--------------------|------------------|
| 26                     | Potentillin | $C_{41}H_{28}O_{26}$ | NQ                | NQ                 | $77.61 \pm 6.91$ |
| <b>Other compounds</b> |             |                      |                   |                    |                  |
| 27                     | Pyrogallol  | $C_6H_6O_3$          | $194.35 \pm 7.34$ | $319.24 \pm 29.14$ | $26.93 \pm 4.08$ |

Aniseed myrtle (AM), cinnamon myrtle (CM), lemon myrtle (LM). Not quantified (NQ)
